P6570

## Performance of the early clinical judgement for the diagnosis of syncope on the emergency department

J. Du Fay De Lavallaz<sup>1</sup>, P.B. Badertscher<sup>2</sup>, T.Z. Zimmermann<sup>1</sup>, T.N. Nestelberger<sup>1</sup>, J.W. Walter<sup>1</sup>, I.S. Strebel<sup>1</sup>, J.S. Lohrmann<sup>1</sup>, J.B. Boeddinghaus<sup>1</sup>, O.M. Miro<sup>3</sup>, M.T. Than<sup>4</sup>, J.M.S. Martin-Sanchez<sup>5</sup>, L.C. Cullen<sup>6</sup>, M.K. Kuehne<sup>1</sup>, T. Reichlin<sup>1</sup>, C.M. Mueller<sup>1</sup>

<sup>1</sup>University Hospital Basel, Cardiology, Basel, Switzerland; <sup>2</sup>University of Illinois at Chicago, Cardiology, Chicago, United States of America; <sup>3</sup>Hospital Clinic de Barcelona, Barcelona, Spain; <sup>4</sup>Christchurch Hospital, Christchurch, New Zealand; <sup>5</sup>Hospital Clinic San Carlos, Madrid, Spain; <sup>6</sup>Royal Brisbane and Women's Hospital, Brisbane, Australia

**Funding Acknowledgement:** Swiss National Science Foundation, Swiss Heart Foundation, Cardiovascular Research Foundation, Basel (Switzerland), University Basel (Switzerland)

**Background:** Clinical judgement of the emergency department (ED) physician at time of discharge outperforms prognostic risk scores but the early clinical judgment (ECJ) regarding diagnosis has never been assessed.

**Methods:** We evaluated the diagnostic accuracy of the ED physicians' ECJ 90 minutes after admission of patients >40 years presenting with syncope to the ED in a prospective diagnostic multicenter study. Cardiac syncope, as adjudicated by two physicians based on information available including 1-year follow-up, was the diagnostic endpoint. Death and MACE were the prognostic endpoints. Lasso-regression was used to identify variables contributing most to the ECJ or to the diagnosis of cardiac syncope. Syncope-specific diagnostic and prognostic scores, high-sensitivity cardiac troponin I (hs-cTnI) and B-type natriuretic peptide (BNP) were used for comparison.

**Results:** Cardiac syncope was adjudicated in 252/1494 patients (15.2%). The diagnostic accuracy of the ECJ for cardiac syncope, as quantified by the Area Under the Curve (AUC), was 0.87 (95% CI 0.84–0.89) and was superior to the one of biomarkers and diagnostic score, constant between all centers, but poorly calibrated. 16 variables available very-early on the ED achieved a comparable performance (AUC 0.84 (95% CI 0.82–0.87),  $p=0.136$ ).

The extrapolated prognostic accuracy of the ECJ was moderate for MACE (AUC 0.73–0.8) but poor for death (0.58–0.63) over two years follow-up.

**Conclusion:** The ECJ performs well for the diagnosis of cardiac syncope but a similar accuracy can be obtained using structured variables obtained very-early in the diagnostic process.

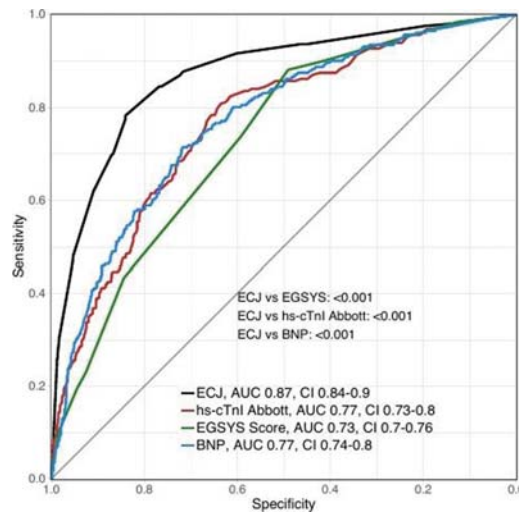

Figure 1
